# Supplementary material for: AKT can modulate the in vitro response of HNSCC cells to irreversible EGFR inhibitors
Source: PubMed Central journal article supplement (PMC5581110; doi:10.18632/oncotarget.18395), 2017-06-07
Supplement: oncotarget-08-53288-s001.pdf [file oncotarget-08-53288-s001.pdf]

# AKT can modulate the *in vitro* response of HNSCC cells to irreversible EGFR inhibitors

## SUPPLEMENTARY MATERIALS

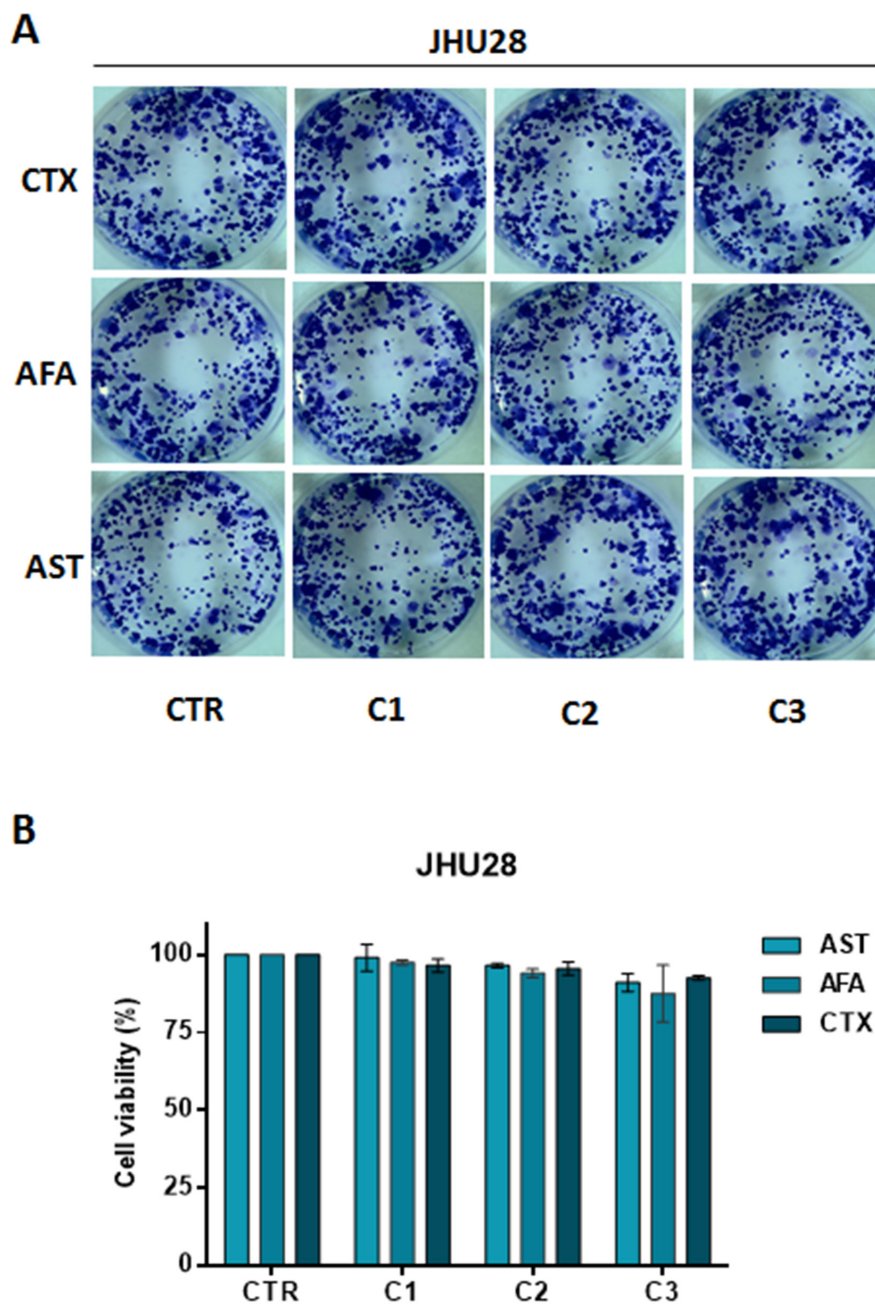

**Supplementary Figure 1: Clonogenic assay of JHU28 cell line (A).** Cells treated with cetuximab (100, 150 and 250  $\mu\text{g}/\text{mL}$ ) or afatinib and allitinib (100, 200, and 500 nM). Bars graph represent the relative colony growth of JHU28 cell line (B). Data presented as mean of three independent experiments.

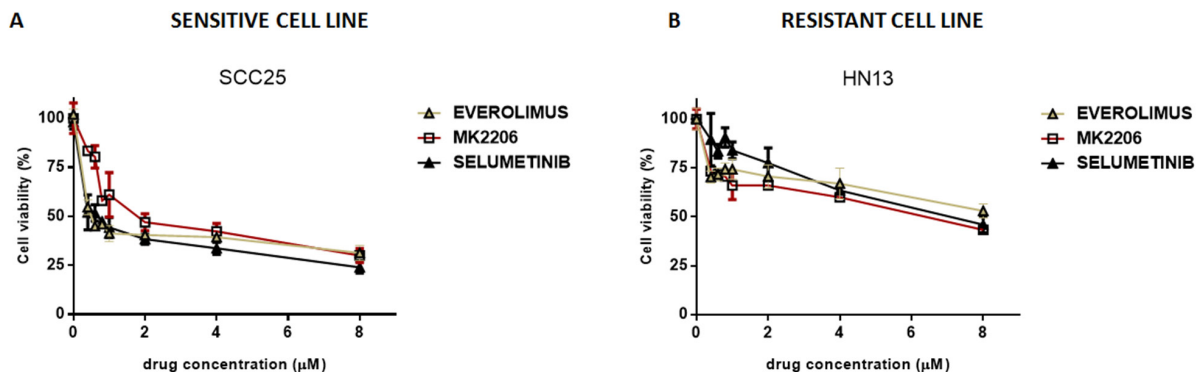

Supplementary Figure 2: Viability analysis (MTS) of sensitive SCC25 (A) and resistance HN13 cells lines (B). Both cell lines were exposed to increased concentrations (0 to 8 µM) of Everolimus, MK2206 and Selumetinib for 72 hours.

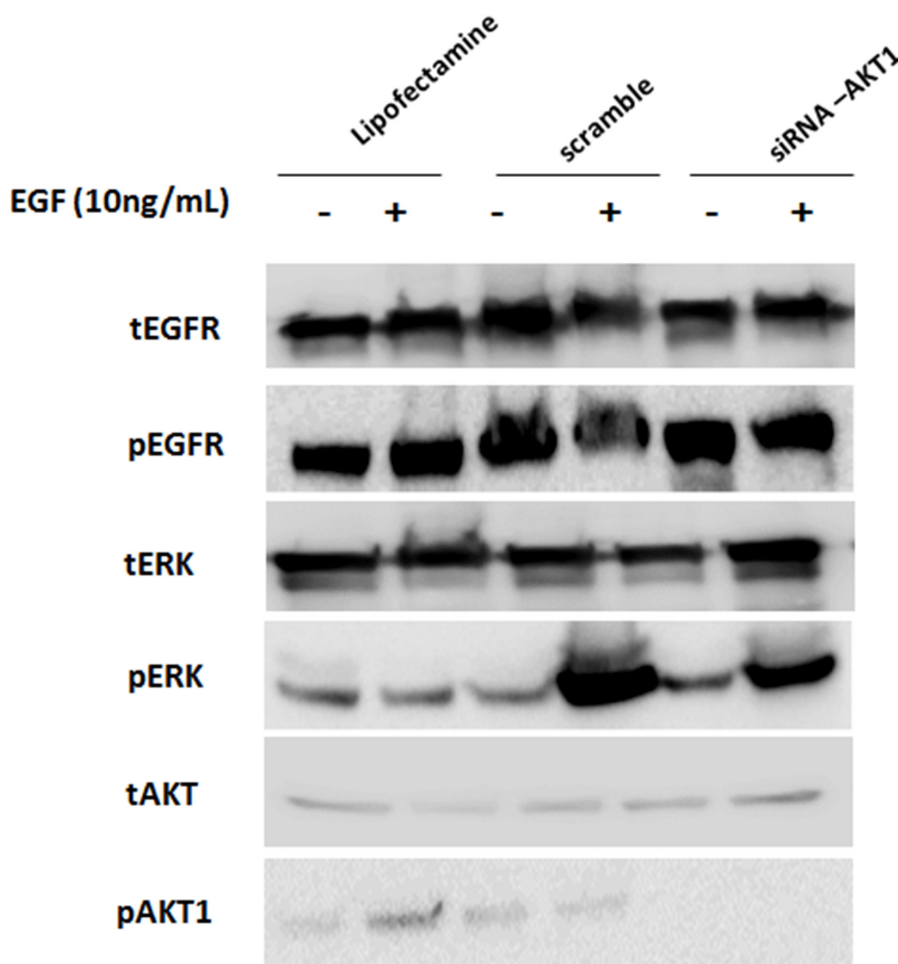

Supplementary Figure 3: Analysis of EGFR, ERK and AKT total and phosphorylated in HN13 (siRNA-AKT1) cell lines by Western Blot. EGF ligand was used at 10 ng/mL for 10 minutes.
